# Supplementary material for: The Pollen Coat Proteome: At the Cutting Edge of Plant Reproduction
Source: MDPI journal article supplement (doi:10.3390/proteomes4010005), 2016-01-29
Supplement: s1 [file s1]

# Supplementary Materials: The Pollen Coat Proteome: At the Cutting Edge of Plant Reproduction

Juan David Rejón, François Delalande, Christine Schaeffer-Reiss, Juan de Dios Alché, María Isabel Rodríguez-García, Alain Van Dorsselaer and Antonio Jesús Castro

**Table S1.** Species discussed in Table 1 and type of stigma. Note that most of the species studied possess a dry-type stigma.

| Species                       | Type of Stigma |
|-------------------------------|----------------|
| <i>Arabidopsis thaliana</i>   | Dry            |
| <i>Brassica carinata</i>      | Dry            |
| <i>Brassica napus</i>         | Dry            |
| <i>Brassica oleracea</i>      | Dry            |
| <i>Brassica rapa</i>          | Dry            |
| <i>Cryptomeria japonica</i>   | NA             |
| <i>Cupressus arizonica</i>    | NA             |
| <i>Cupressus sempervirens</i> | NA             |
| <i>Cynodon dactylon</i>       | Dry            |
| <i>Helianthus annuus</i>      | Wet            |
| <i>Olea europaea</i>          | Wet            |
| <i>Nicotiana tabacum</i>      | Wet            |
| <i>Oryza sativa</i>           | Dry            |
| <i>Phleum pretense</i>        | Dry            |
| <i>Sorghum halepense</i>      | Dry            |
| <i>xTriticosecale</i>         | Dry            |
| <i>Vicia faba</i>             | Dry            |
| <i>Zea Mays</i>               | Dry            |

NA, not applicable.

**Table S2.** Subcellular localization of proteins reviewed in Table 1 on the basis of the enzyme and immunocytochemical data.

| Protein Name            | Species (Method <sup>1</sup> )    | Subcellular Location <sup>2</sup> | References |
|-------------------------|-----------------------------------|-----------------------------------|------------|
| <b>AChE</b>             |                                   |                                   |            |
| Acetylcholinesterase    | <i>Olea europaea</i> (EC)         | Ap/Cy/PC/PTC/PTW                  | [1]        |
| Cholinesterase          | <i>Vicia faba</i> (EC)            | Ap/PC/PTC/PTW                     | [2]        |
| <b>AGP-JIM13</b>        | <i>O. europaea</i> (CM/TEM)       | Ap/Cy/GCW/PC/PTC/PTW              | [3]        |
| <b>Beta-expansins</b>   |                                   |                                   |            |
| Phl p 1 allergen        | <i>Phleum pretense</i> (TEM)      | Cy/Ex/Nu/PC                       | [4]        |
| Zea m 1 allergen        | <i>Zea mays</i> (TEM)             | Cy/Ex/PC                          | [5]        |
| <b>Caleosin</b>         | <i>O. europaea</i> (CM/TEM)       | Ex/LB/PC/PTC/PTM/PTV/TER/TLB      | [6,7]      |
| <b>Calmodulin-like</b>  |                                   |                                   |            |
| Bra r 1                 | <i>Brassica rapa</i> (LM/TEM)     | Cy/PC/PS/TC                       | [8]        |
| <b>Cys proteases</b>    |                                   |                                   |            |
| CEP1                    | <i>Arabidopsis thaliana</i> (TEM) | TCW/Ex/PC/TC/TV                   | [9]        |
| Cysteine protease       | <i>Zea Mays</i> (CM)              | PS/TV                             | [10]       |
| <b>Ole e 1</b>          | <i>Olea europaea</i> (FM/TEM)     | Ap/ER/Ex/PC/PTC/TER               | [11,12]    |
| <b>Pectate lyases</b>   |                                   |                                   |            |
| Cry j 1                 | <i>Cryptomeria japonica</i> (TEM) | GCW/Ex/Go/PC/TR                   | [13]       |
| Cup a 1                 | <i>Cupressus arizonica</i> (TEM)  | Cy/Ex/Go/In/LB/Nu/Or/PC/V         | [14]       |
| Cry j 1-like            | <i>C. sempervirens</i> (TEM)      | Cy/Ex/Go/In/LB/Nu/Or/PC/V         | [14]       |
| <b>Phl p 4</b>          | <i>Phleum pretense</i> (TEM)      | PC/Cy                             | [15]       |
| <b>Polygalaturonase</b> | <i>Brassica napus</i> (LM)        | PS/PTC                            | [16]       |

|                   |                                   |               |         |
|-------------------|-----------------------------------|---------------|---------|
| <b>SP11/SCR</b>   | <i>Brassica rapa</i> (SEM/TEM)    | Cy/Ex/PC/TC   | [17,18] |
| <b>Profilins</b>  |                                   |               |         |
| Ole e 2           | <i>Olea europaea</i> (TEM)        | Cy/Ex/PC      | [19]    |
| <b>T-oleosins</b> |                                   |               |         |
| BnOlnB;4          | <i>Arabidopsis thaliana</i> (TEM) | PC/Ta/TER/TLB | [20]    |
| BnOlnB;4          | <i>Brassica carinata</i> (TEM)    | PC/Ta         | [21]    |
| BnOlnB;3–4        | <i>Brassica napus</i> (TEM)       | PC/TLB        | [22]    |
| BnOlnB;3–4        | <i>Brassica napus</i> (CM)        | PS/Ta/TER/TLB | [23]    |

<sup>1</sup> CM, confocal microscopy; EC, enzyme cytochemistry; FM, fluorescence microscopy; LM, light microscopy; SEM, scanning electron microscopy; TEM, transmission electron microscopy; <sup>2</sup> AP, pollen aperture; Cy, pollen vegetative cell cytoplasm; ER, pollen endoplasmic reticulum; Ex, pollen exine; GCW, pollen generative cell wall; Go, pollen Golgi apparatus; In, pollen intine; LB, pollen lipid body; Nu, vegetative cell nucleus; Or, pollen orbicule; PC, pollen coat; PS, pollen surface; PTC, pollen tube cytoplasm; PTM, pollen tube plasma membrane; PTV, pollen tube vacuole; PTW, pollen tube wall; Ta, tapetosome; TC, tapetum cytoplasm; TCW, tetrad callose wall; TER, tapetum ER; TLB, tapetum lipid body; TR, thecal remnants; TV, tapetum vacuole; V, vegetative cell vacuole.

## References

- Rejón, J.D.; Zienkiewicz, A.; Rodríguez-García, M.I.; Castro, A.J. Profiling and functional classification of esterases in olive (*Olea europaea*) pollen during germination. *Ann. Bot.* **2012**, *110*, 1035–1045.
- Bednarska, E. The localization of nonspecific esterase and cholinesterase activity in germinating pollen and in pollen tube of *Vicia faba*. I. The effect of actinomycin-D and cycloheximide. *Biol. Plant.* **1992**, *34*, 229–240.
- Castro, A.J.; Suárez, C.; Zienkiewicz, K.; Alché, J.D.; Zienkiewicz, A.; Rodríguez-García, M.I. Electrophoretic profiling and immunocytochemical detection of pectins and arabinogalactan proteins in olive pollen during germination and pollen tube growth. *Ann. Bot.* **2013**, *112*, 503–513.
- Staff, I.A.; Taylor, P.E.; Smith, P.; Singh, M.B.; Knox, R.B. Cellular localization of water-soluble, allergenic proteins in rye-grass (*Lolium perenne*) pollen using monoclonal and specific IgE antibodies with immunogold probes. *Histochem. J.* **1990**, *22*, 276–290.
- Wang, W.; Milanesi, C.; Faleri, C.; Cresti, M. Localization of group-1 allergen Zea m 1 in the coat and wall of maize pollen. *Acta Histochem.* **2006**, *108*, 395–400.
- Zienkiewicz, K.; Zienkiewicz, A.; Rodríguez-García, M.I.; Castro, A.J. Characterization of a caleosin expressed during olive (*Olea europaea* L.) pollen ontogeny. *BMC Plant Biol.* **2011**, *11*, 122.
- Zienkiewicz, K.; Castro, A.J.; Alché, J.D.; Zienkiewicz, A.; Suarez, C.; Rodríguez-García, M.I. Identification and localization of a caleosin in olive (*Olea europaea* L.) pollen during *in vitro* germination. *J. Exp. Bot.* **2010**, *61*, 1537–1546.
- Okada, T.; Zhang, Z.J.; Russell, S.D.; Toriyama, K. Localization of the Ca<sup>2+</sup>-binding protein, Bra r 1, in anthers and pollen tubes. *Plant Cell Physiol.* **1999**, *40*, 1243–1252.
- Zhang, D.; Liu, D.; Lv, X.; Wang, Y.; Xun, Z.; Liu, Z.; Li, F.; Lu, H. The cysteine protease CEP1, a key executor involved in tapetal programmed cell death, regulates pollen development in *Arabidopsis*. *Plant Cell* **2014**, *26*, 2939–2961.
- Li, Y.; Suen, D.F.; Huang, C.Y.; Kung, S.Y.; Huang, A.H.C. The maize tapetum employs diverse mechanisms to synthesize and store proteins and flavonoids and transfer them to the pollen surface. *Plant Physiol.* **2012**, *158*, 1548–1561.
- Alché, J.D.; Castro, A.J.; Olmedilla, A.; Fernández, M.C.; Rodríguez, R.; Villalba, M.; Rodríguez-García, M.I. The major olive pollen allergen (Ole e I) shows both gametophytic and sporophytic expression during anther development, and its synthesis and storage takes place in the RER. *J. Cell Sci.* **1999**, *112*, 2501–2509.
- Alché, J.D.; M'rani-Alaoui, M.; Castro, A.J.; Rodríguez-García, M.I. Ole e 1, the major allergen from olive (*Olea europaea* L.) pollen, increases its expression and is released to the culture medium during *in vitro* germination. *Plant Cell Physiol.* **2004**, *45*, 1149–1157.
- Miki-Hirosige, H.; Nakamura, S.; Yasueda, H.; Shida, T.; Takahashi, Y. Immunocytochemical localization of the allergenic proteins in the pollen of *Cryptomeria japonica*. *Sex. Plant Reprod.* **1994**, *7*, 95–100.

14. Suárez-Cervera, M.; Takahashi, Y.; Vega-Maray, A.; Seoane-Camba, J.A. Immunocytochemical localization of Cry j 1, the major allergen of *Cryptomeria japonica* (Taxodiaceae) in *Cupressus arizonica* and *Cupressus sempervirens* (Cupressaceae) pollen grains. *Sex. Plant Reprod.* **2003**, *16*, 9–15.
15. Fischer, S.; Grote, M.; Fahlbusch, B.; Muller, W.D.; Kraft, D.; Valenta, R. Characterization of Phl p 4, a major timothy grass (*Phleum pratense*) pollen allergen. *J. Allergy Clin. Immunol.* **1996**, *98*, 189–198.
16. Dearnaley, J.D.W.; Daggard, G.A. Expression of a polygalacturonase enzyme in germinating pollen of *Brassica napus*. *Sex. Plant Reprod.* **2001**, *13*, 265–271.
17. Shiba, H.; Takayama, S.; Iwano, M.; Shimosato, H.; Funato, M.; Nakagawa, T.; Che, F.S.; Suzuki, G.; Watanabe, M.; Hinata, K.; Isogai, A. A pollen coat protein, SP11/SCR, determines the pollen S-specificity in the self-incompatibility of *Brassica* species. *Plant Physiol.* **2001**, *125*, 2095–2103.
18. Iwano, M.; Shiba, H.; Funato, M.; Shimosato, H.; Takayama, S.; Isogai, A. Immunohistochemical studies on translocation of pollen S-haplotype determinant in self-incompatibility of *Brassica rapa*. *Plant Cell Physiol.* **2003**, *44*, 428–436.
19. Morales, S.; Jiménez-López, J.C.; Castro, A.J.; Rodríguez-García, M.I.; Alché, J.D. Olive pollen profilin (Ole e 2 allergen) co-localizes with highly active areas of the actin cytoskeleton and is released to the culture medium during *in vitro* pollen germination. *J. Microsc.* **2008**, *231*, 332–341.
20. Lévesque-Lemay, M.; Chabot, D.; Hubbard, K.; Chan, J.K.; Miller, S.; Robert L.S. Tapetal oleosins play an essential role in tapetosome formation and protein relocation to the pollen coat. *New Phytol.* **2016**, *209*, 691–704.
21. Foster, E.; Schneiderman, D.; Cloutier, M.; Gledlie, S.; Robert, L.S. Modifying the pollen coat protein composition in *Brassica*. *Plant J.* **2002**, *31*, 477–486.
22. Murphy, D.J.; Ross, J.H.E. Biosynthesis, targeting and processing of oleosin-like proteins, which are major pollen coat components in *Brassica napus*. *Plant J.* **1998**, *13*, 1–16.
23. Hsieh, K.; Huang, A.H.C. Lipid-rich tapetosomes in *Brassica* tapetum are composed of oleosin-coated oil droplets and vesicles, both assembled in and then detached from the endoplasmic reticulum. *Plant J.* **2005**, *43*, 889–899.

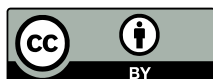

© 2016 by the authors; licensee MDPI, Basel, Switzerland. This article is an open access article distributed under the terms and conditions of the Creative Commons by Attribution (CC-BY) license (<http://creativecommons.org/licenses/by/4.0/>).
